# Supplementary material for: Comparative analysis of genome-scale, base-resolution DNA methylation profiles across 580 animal species
Source: PubMed Central journal article supplement (PMC9842680; doi:10.1038/s41467-022-34828-y), 2023-01-16
Supplement: 41467_2022_34828_MOESM3_ESM.pdf [file 41467_2022_34828_MOESM3_ESM.pdf]

## **DESCRIPTION OF ADDITIONAL FILES**

**Comparative analysis of genome-scale, base-resolution DNA methylation profiles across 580 animal species**

### **Supplementary Data**

**Supplementary Data 1.** Annotation data and DNA methylation profiling statistics for all processed samples

**Supplementary Data 2.** Annotation data for the animal species included in this study

**Supplementary Data 3.** Annotation data for the individual animals included in this study

**Supplementary Data 4.** Annotation data and DNA sequencing statistics for the unconverted libraries
